# Supplementary material for: C4 anatomy can evolve via a single developmental change
Source: PubMed Central journal article supplement (PMC6849723; doi:10.1111/ele.13191), 2018-12-17
Supplement: ELE-22-302-s001.pdf [file ELE-22-302-s001.pdf]

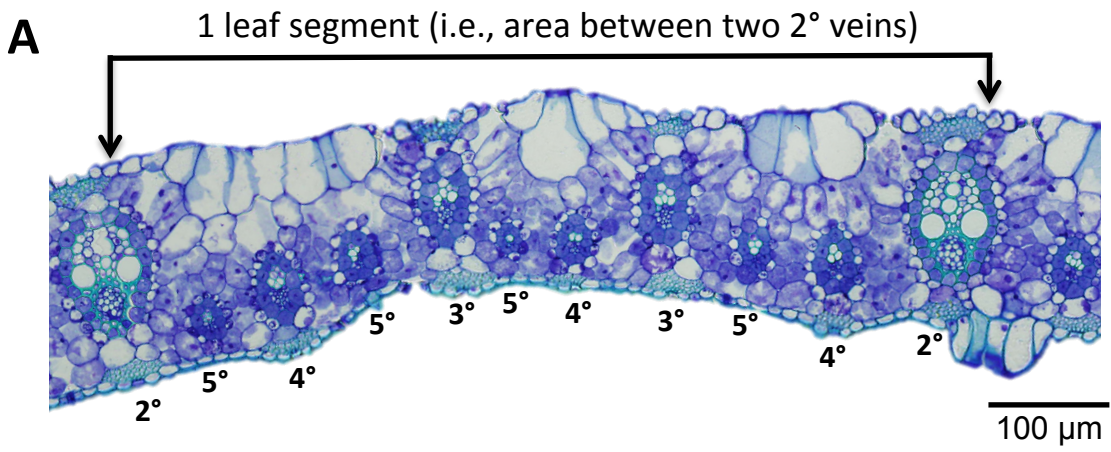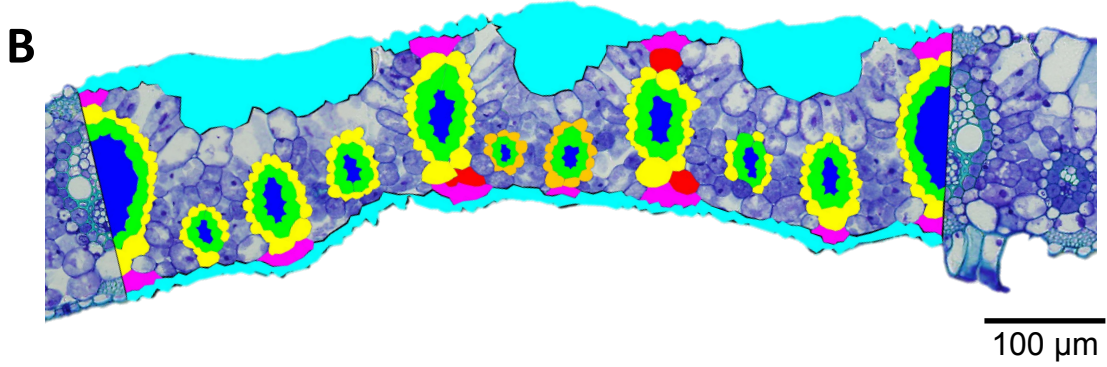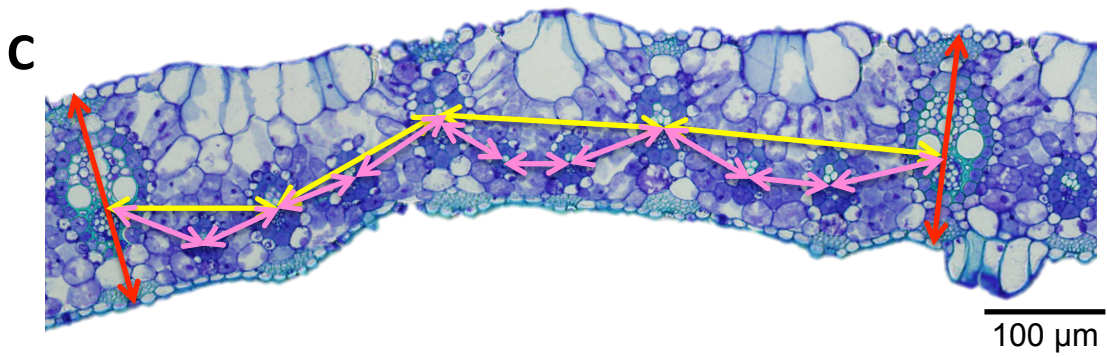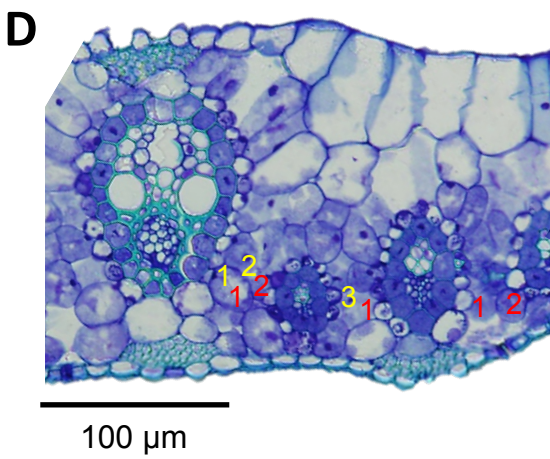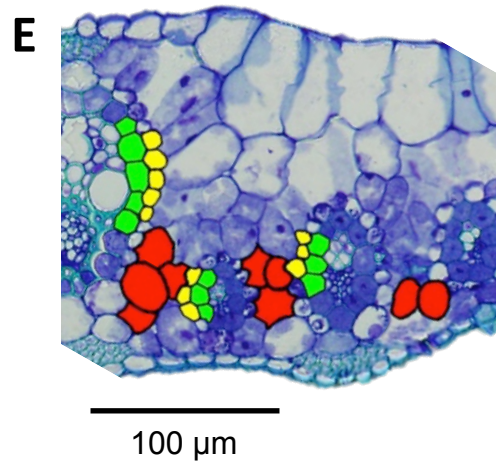

Figure S1

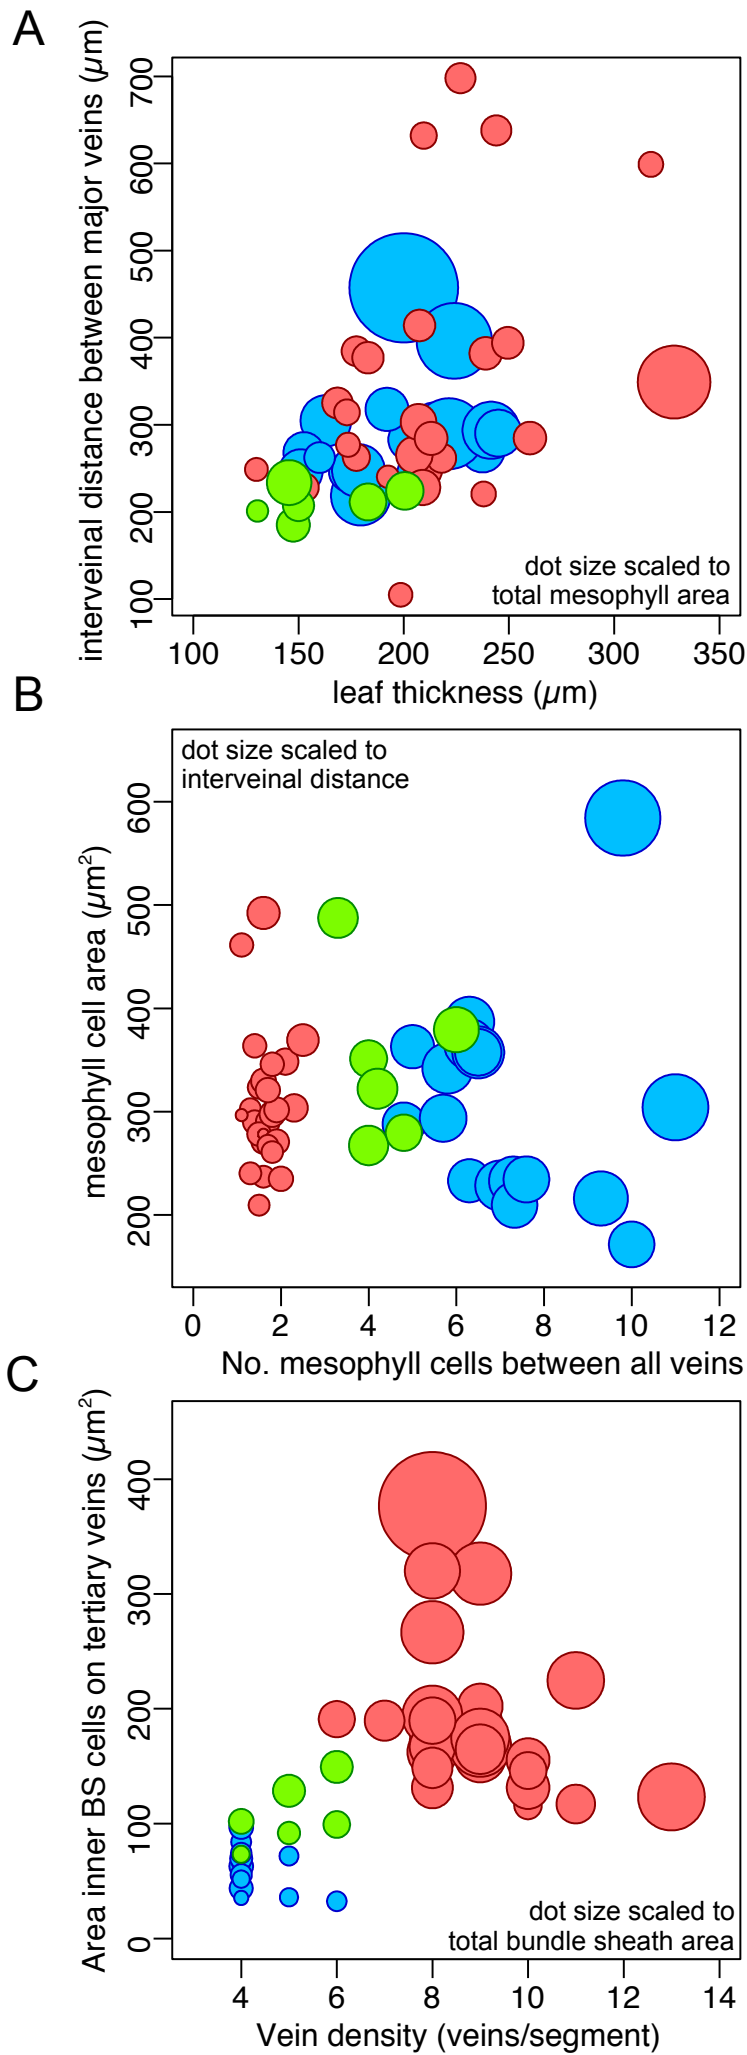

**Figure S2**



**A**

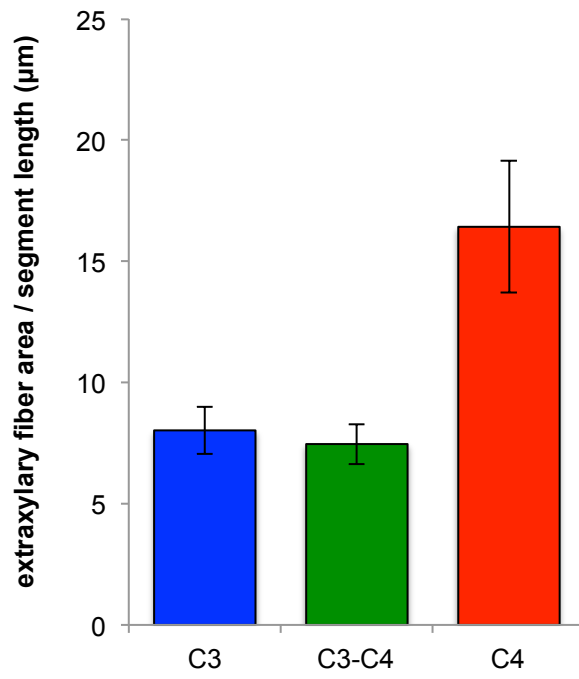

**B**

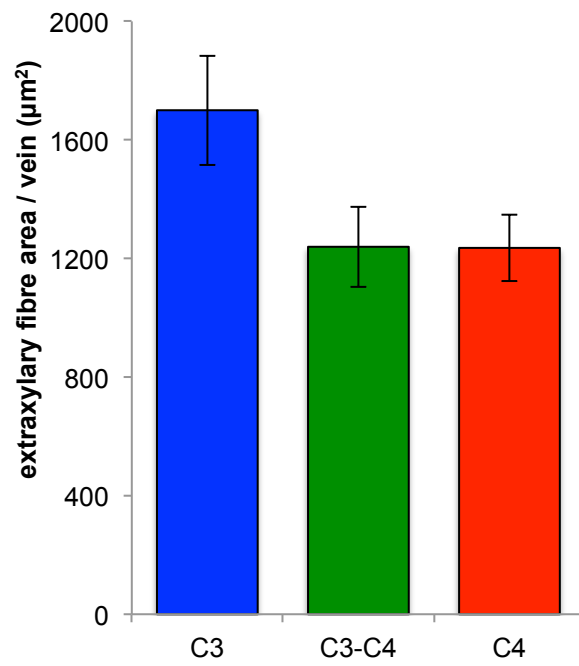

**Figure S3**

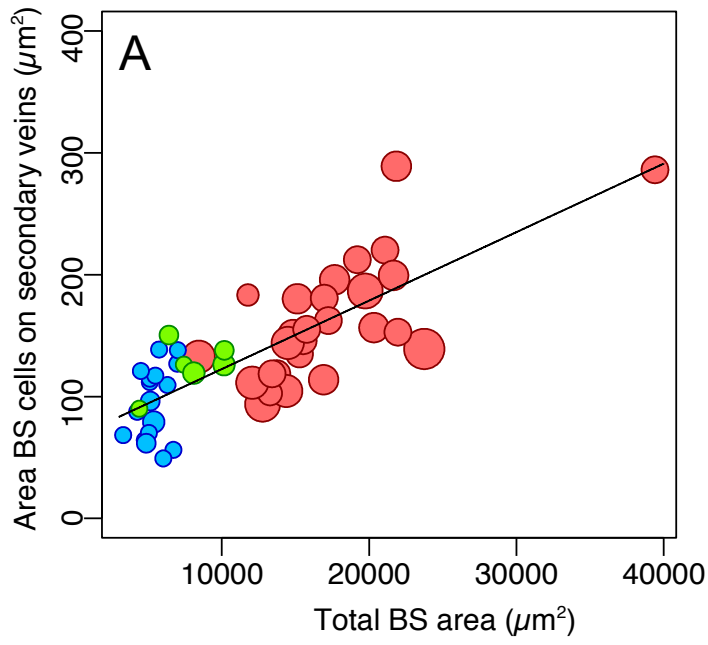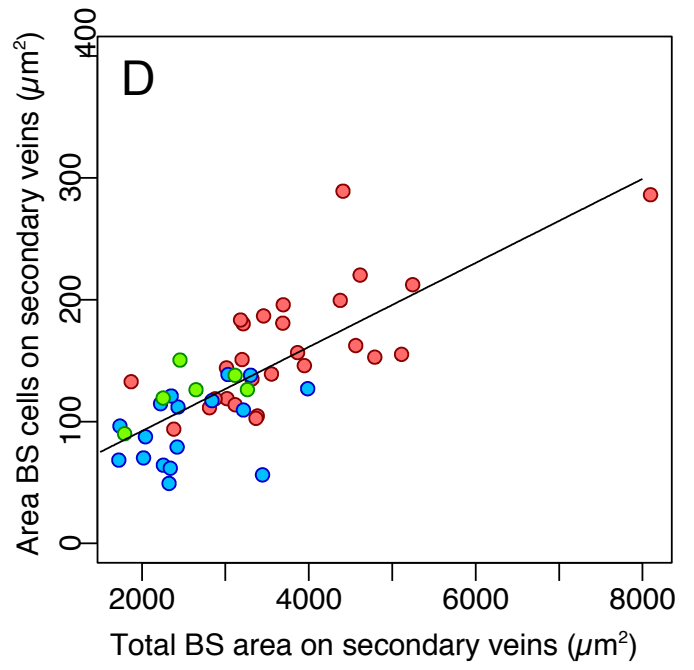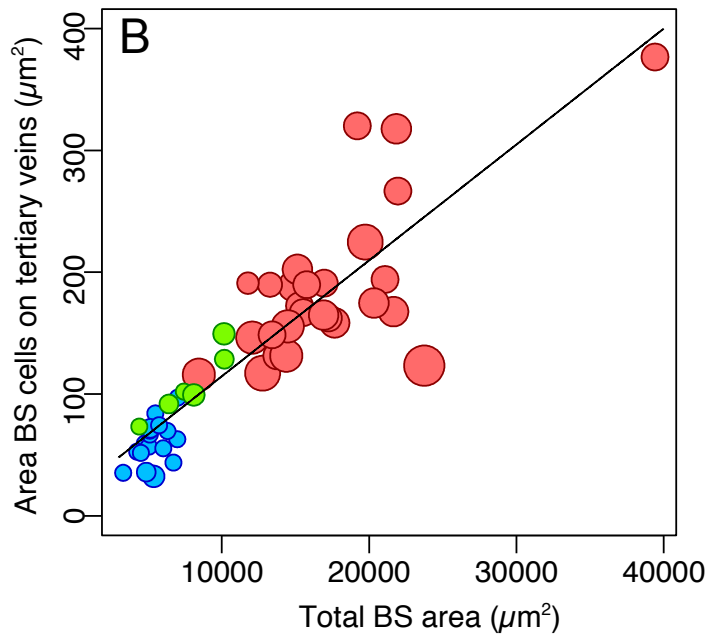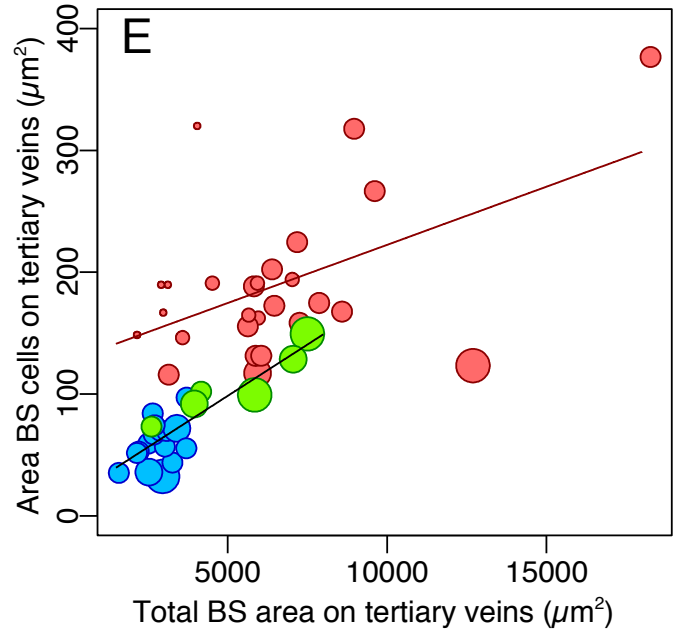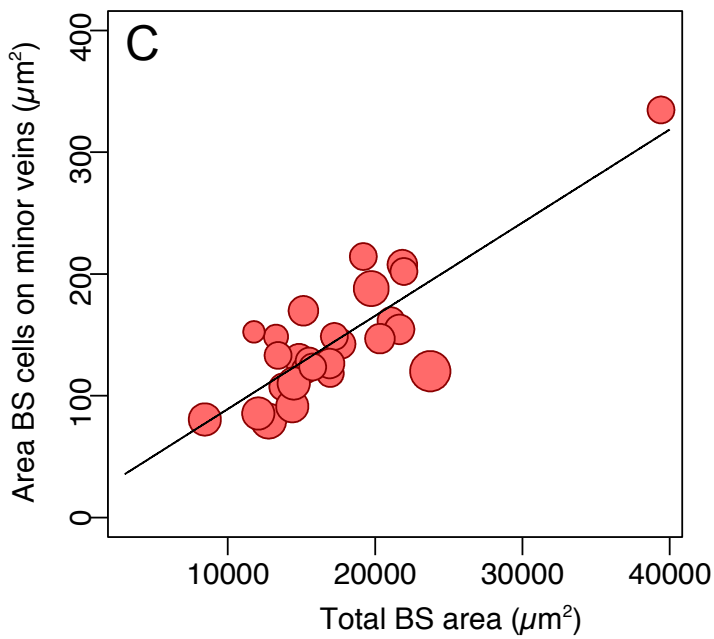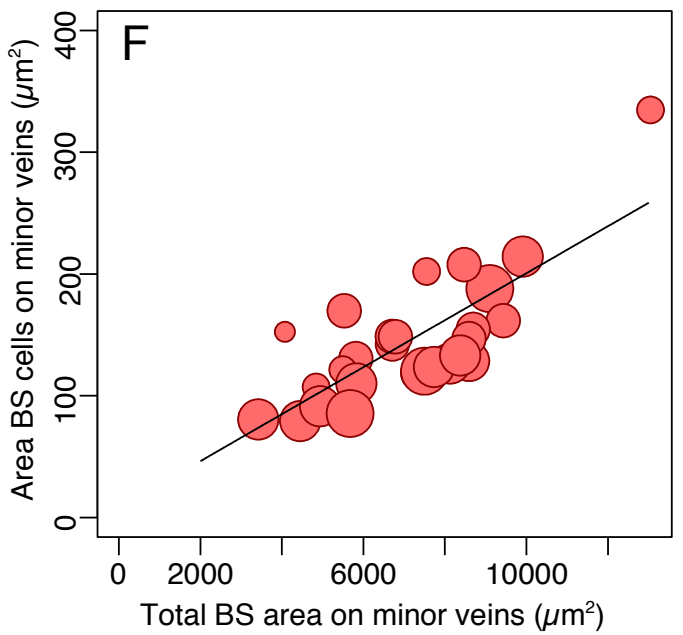

**Figure S4**





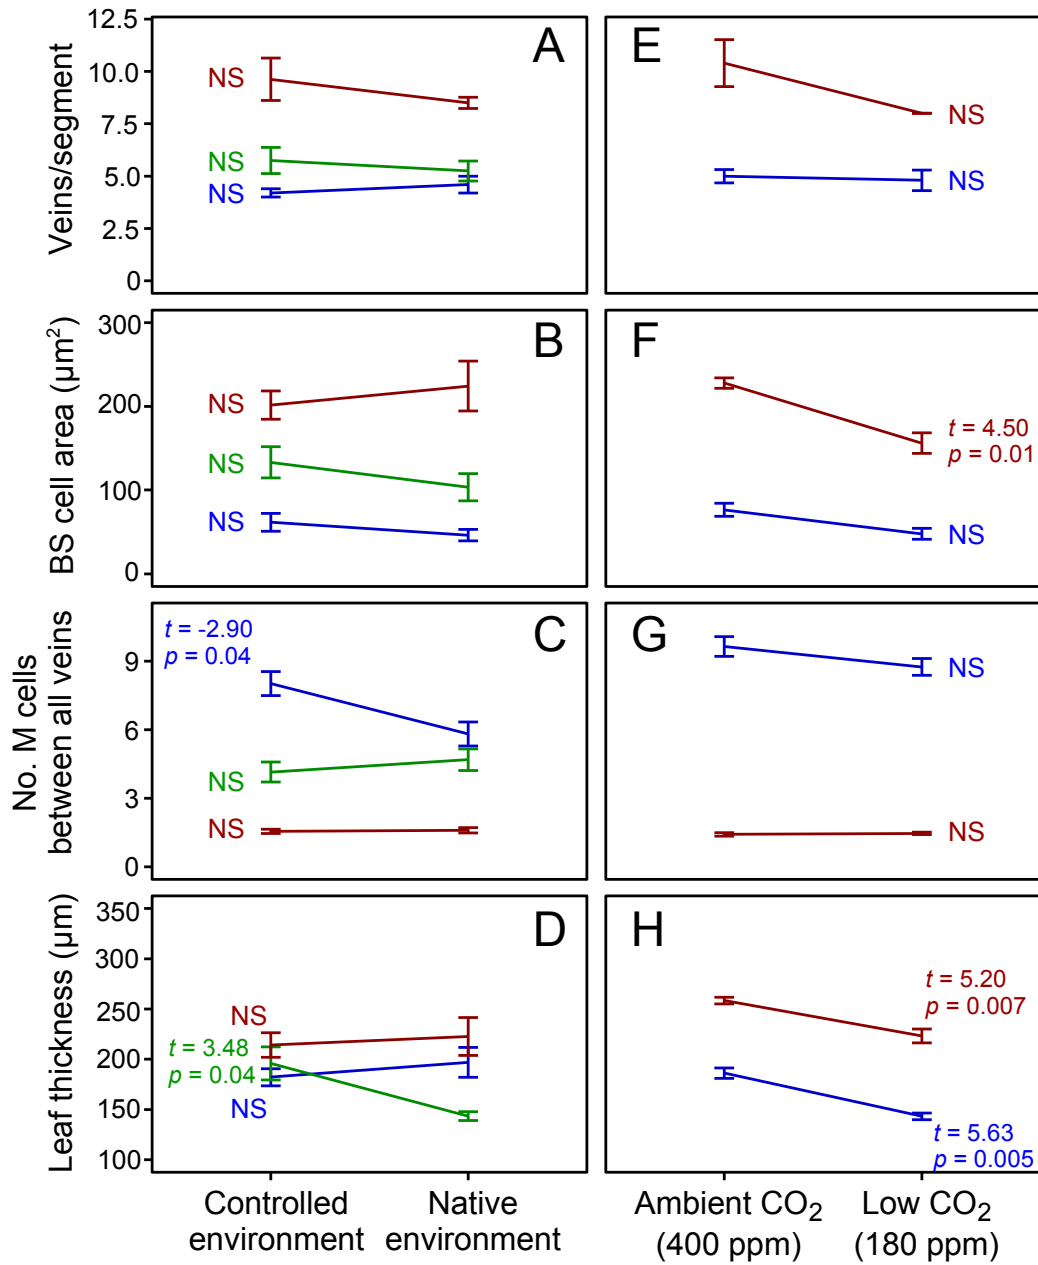

**Figure S6**

**Mesophyll**

**Bundle Sheath**

**C3**

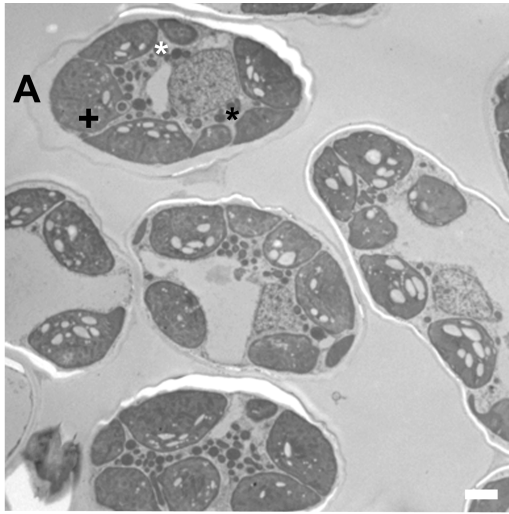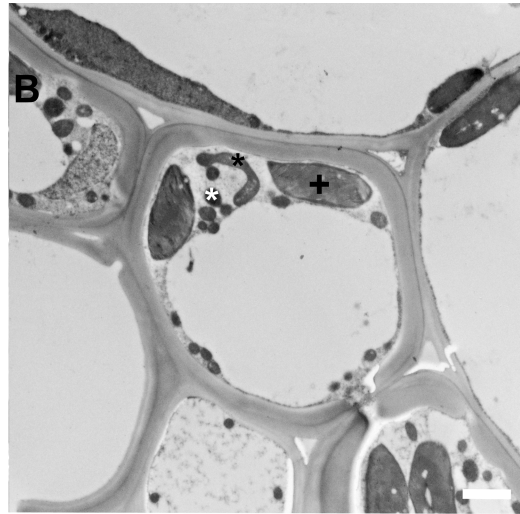

**C3-C4**

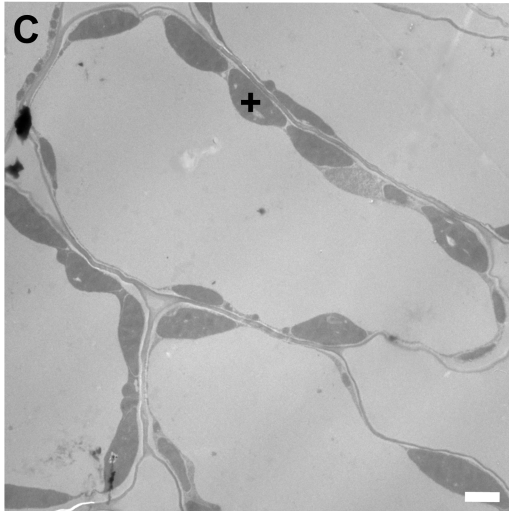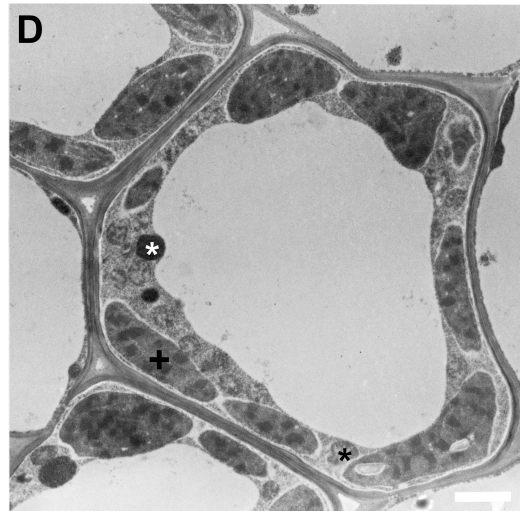

**C4**

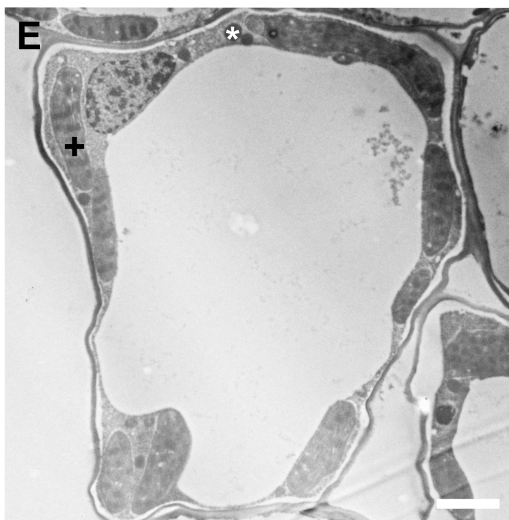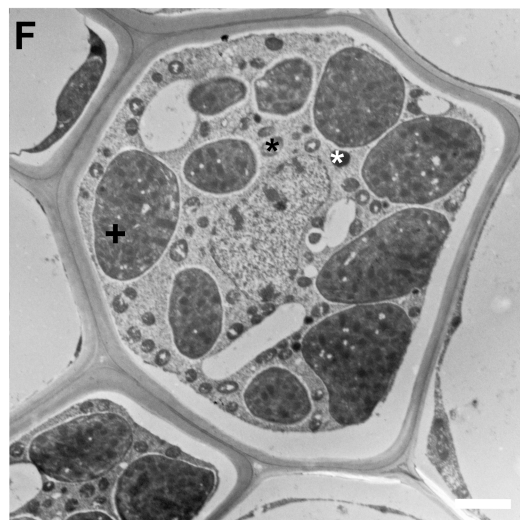

**Figure S7**

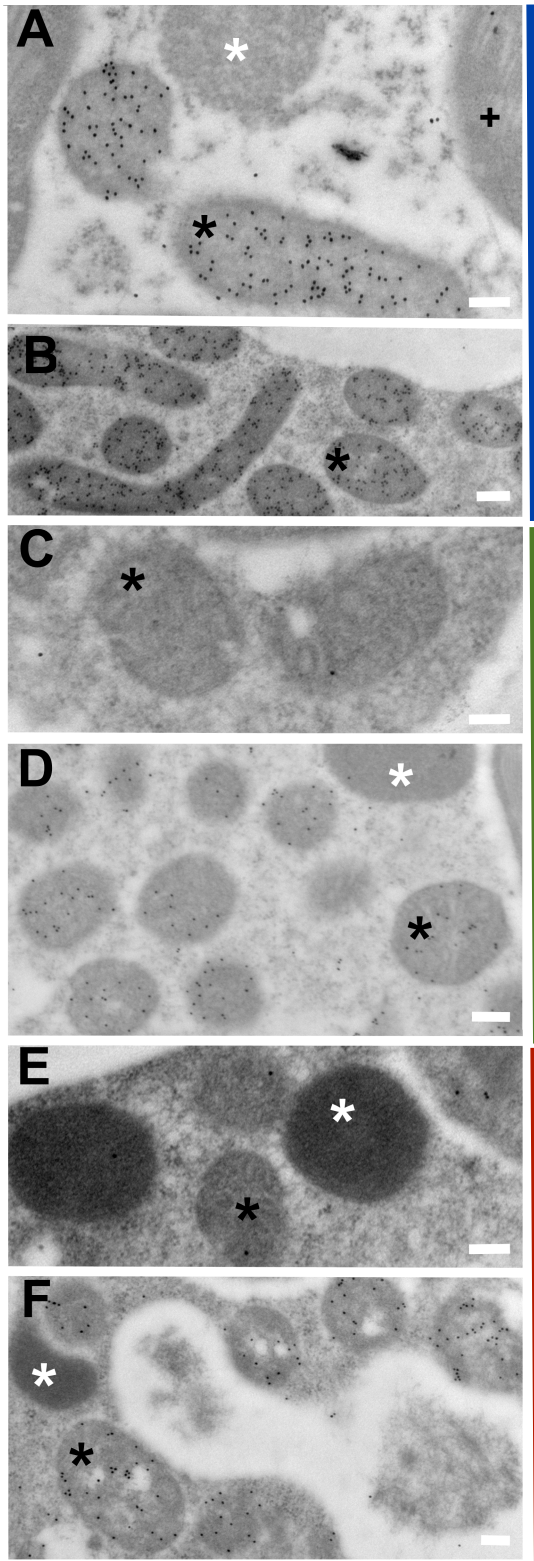

**C3**

**C3-C4**

**C4**

**Figure S8**



Mesophyll

Bundle sheath

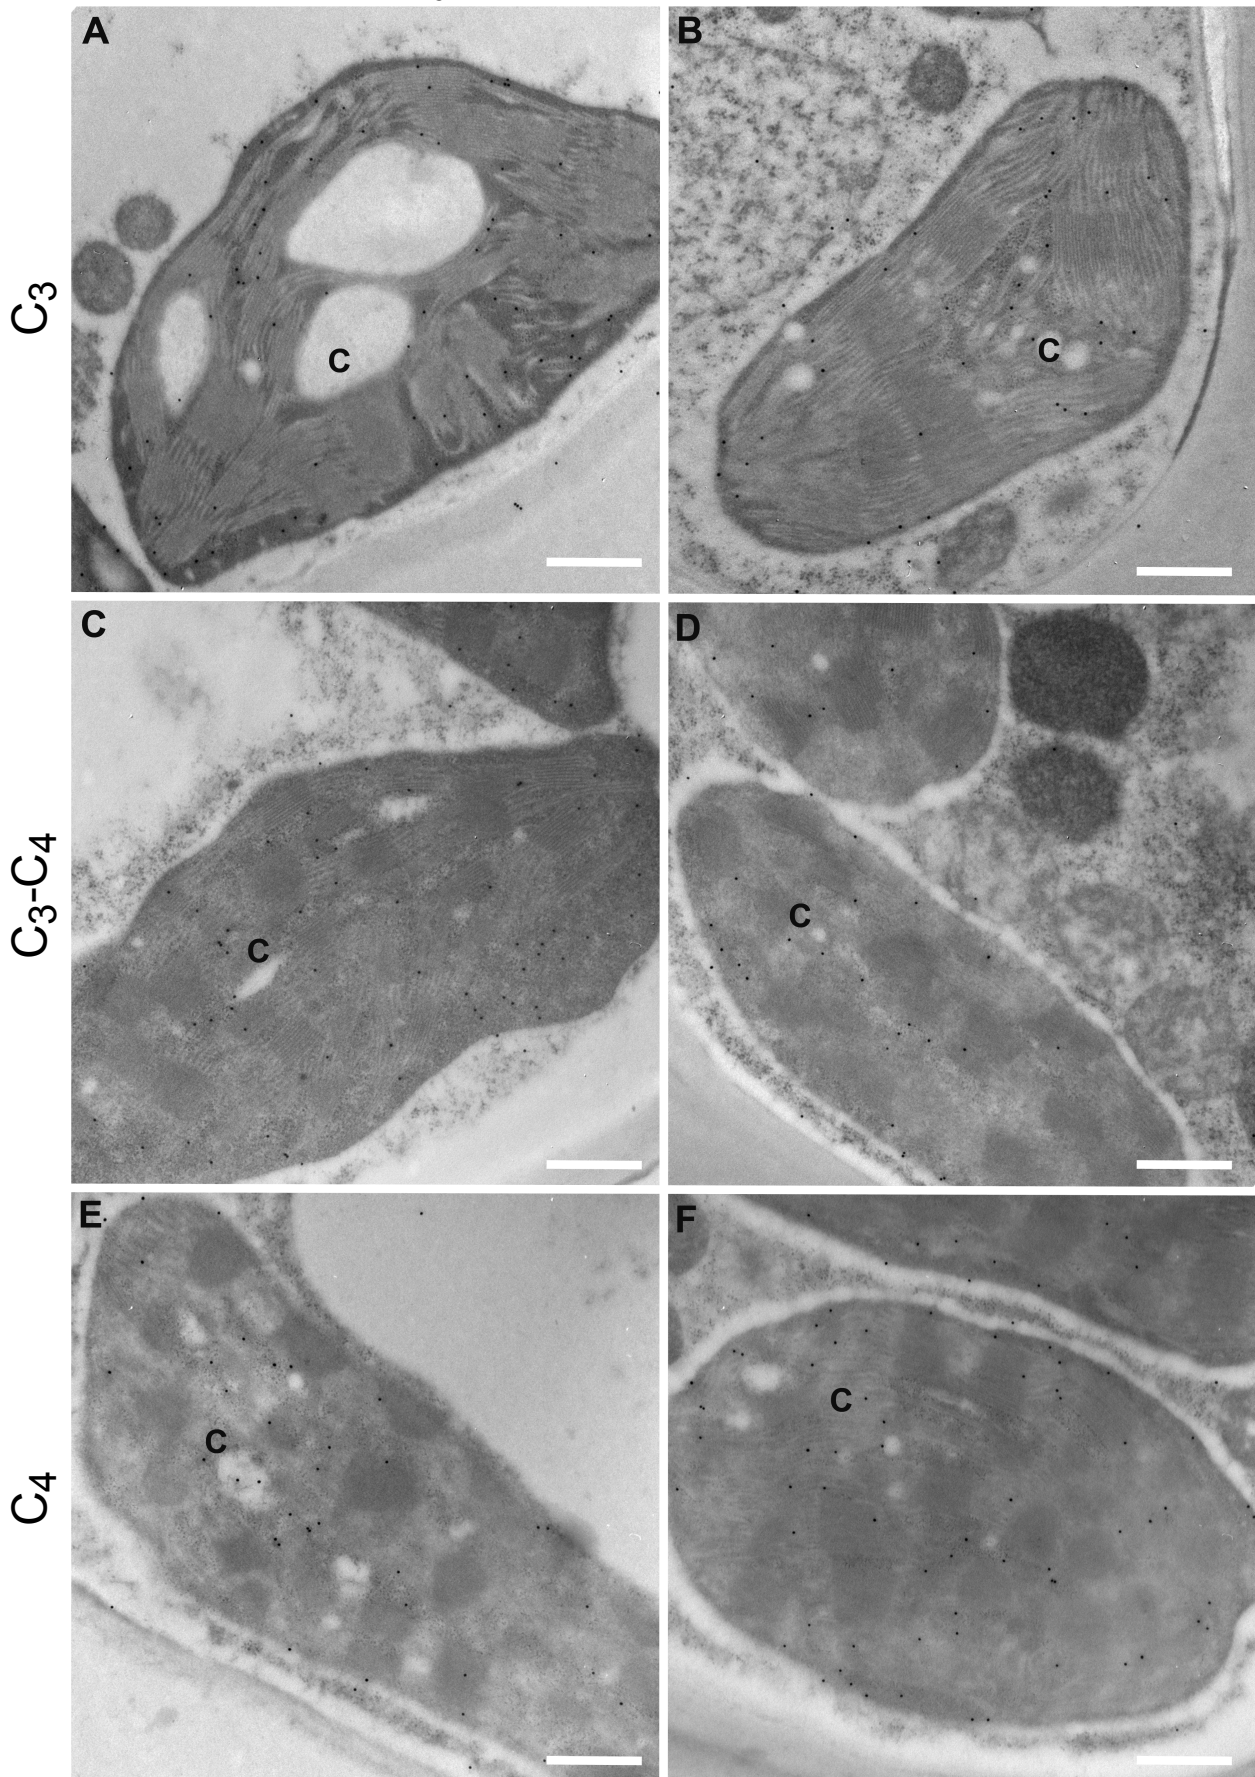

**Figure S9**
