# Supplementary material for: C4 anatomy can evolve via a single developmental change
Source: PubMed Central journal article supplement (PMC6849723; doi:10.1111/ele.13191), 2018-12-17
Supplement: ELE-22-302-s003.pdf [file ELE-22-302-s003.pdf]

# **SUPPORTING INFORMATION**

## **C<sub>4</sub> anatomy can evolve via a single developmental change**

Marjorie R. Lundgren, Luke T. Dunning, Jill K. Olofsson, Jose J. Moreno-Villena, Jacques W. Bouvier, Tammy Sage, Roxana Khoshnavesh, Stefanie Sultmanis, Matt Stata, Brad Ripley, Maria S. Vorontsova, Guillaume Besnard, Claire Adams, Nicholas Cuff, Anthony Mapaura, Matheus Bianconi, Christine M. Long, Pascal-Antoine Christin, Colin P. Osborne

## **SUPPORTING INFORMATION**

Supporting Information Materials 1. Ultrastructural characterization of C<sub>3</sub>, C<sub>3</sub>-C<sub>4</sub> and C<sub>4</sub> accessions

Dataset S1. Comprehensive anatomical measurements for all accessions

Dataset S2. Larger vein density dataset

Dataset S3. Field v controlled environment plasticity dataset

Dataset S4. Growth CO<sub>2</sub> concentration plasticity dataset

Figure S1. Example leaf anatomy measurement methods

Figure S2. Relationships between anatomical traits

Figure S3. Comparison of extraxylary fibre area in C<sub>3</sub>, C<sub>3</sub>-C<sub>4</sub> and C<sub>4</sub> accessions

Figure S4. Relationships between inner BS cell size and overall BS areas

Figure S5. Comparison of bundle sheath size in African and non-African C<sub>4</sub> accessions.

Figure S6. Plasticity for leaf anatomical components by photosynthetic type

Figure S7. Organelle abundance differs between photosynthetic types.

Figure S8. Immunodetection of GLDH

Figure S9. Immunodetection of Rubisco large subunit

Table S1. Details used to determine photosynthetic pathway for accessions

Table S2. Details of the accessions used in the plasticity dataset

## SUPPORTING INFORMATION MATERIALS 1.

### ULTRASTRUCTURAL AND IMMUNOLOGICAL CHARACTERIZATION OF C<sub>3</sub>, C<sub>3</sub>-C<sub>4</sub> AND C<sub>4</sub> ACCESSIONS

---

Our broad comparative analysis focused on gross leaf anatomy, capturing differences in tissue volumes and cell numbers and sizes. However, previous work in other species has reported ultrastructural differences between photosynthetic types, involving the distribution and characteristics of organelles and subcellular elements (Hattersley *et al.* 1986; Muhaidat *et al.* 2011; Sage *et al.* 2014; Stata *et al.* 2014, 2016). To evaluate whether gross anatomical changes were sufficient for the transition to C<sub>4</sub> photosynthesis, or whether these ultrastructural components might also have been involved, we applied TEM to a subset of plants representing the photosynthetic diversity in *Alloteropsis semialata*, following Khoshravesh *et al.* 2017.

We examined leaf ultrastructure in one accession each representing the C<sub>3</sub> (KWT, South Africa), C<sub>3</sub>-C<sub>4</sub> (L04B, Tanzania), and C<sub>4</sub> (QSLD, Australia) types, but did not sample the diversity of C<sub>4</sub> and C<sub>3</sub>-C<sub>4</sub> accessions used in the gross leaf anatomy analysis. As such, we are unable to establish the minimum differences between these phenotypes. However, our results indicate that the ultrastructure of M and BS cells differs between the C<sub>3</sub>, C<sub>3</sub>-C<sub>4</sub>, and C<sub>4</sub> accessions. The M chloroplasts of the C<sub>3</sub> accession are more numerous, larger, and cover the cell periphery more than in C<sub>3</sub>-C<sub>4</sub> and C<sub>4</sub> types, which is consistent with findings from other physiologically diverse lineages (Fig. S7; Stata *et al.* 2014; 2016). Mitochondria and peroxisomes are also more abundant in C<sub>3</sub> M cells compared to their C<sub>3</sub>-C<sub>4</sub> and C<sub>4</sub> counterparts (Fig. S7). The high organelle abundance in the BS of the C<sub>4</sub> accession co-occurs with a constriction of the vacuole (Fig. S7f). Accompanying the activation of BS as the site of carbon concentration, the numbers of BS chloroplasts, mitochondria, and peroxisomes increase between the C<sub>3</sub> and C<sub>4</sub> accessions, with the C<sub>3</sub>-C<sub>4</sub> type showing intermediate abundances (Fig. S7). These findings are consistent with previous comparisons of leaf ultrastructure between the photosynthetic types of *A. semialata* (Ueno & Sentoku 2006; Frean *et al.* 1983) and in the grass

genus *Neurachne* (Hattersley *et al.* 1986). In C<sub>3</sub>-C<sub>4</sub> and C<sub>4</sub> *A. semialata*, the BS organelles are not localized centrifugally or centripetally along the cell wall (Fig. S7d,f), but are instead evenly dispersed throughout the BS cells. This lack of patterning in organelle arrangement has been observed before in *A. semialata* (Ueno & Sentoku 2006; Frean *et al.* 1983) and other grass species that use the inner sheath for the Calvin cycle (*e.g.*, *Neurachne minor*; Hattersley *et al.* 1986), and likely arises because the combination of BS wall and outer sheath layer represents a strong barrier to CO<sub>2</sub> diffusion out of the BS, such that BS organelles do not need to congregate along the cell periphery to maintain high functionality (Sage *et al.* 2014). Together, these findings are consistent with the hypothesis that the transition between non-C<sub>4</sub> and C<sub>4</sub> states was accompanied by enrichment of BS organelles that displaced vacuole area in *A. semialata*.

Strong labelling of glycine decarboxylase H sub-protein (GLDH) is detected in the mitochondria of C<sub>3</sub> but not C<sub>3</sub>-C<sub>4</sub> or C<sub>4</sub> M cells (Fig. S8a,c,e), and in the BS mitochondria of all analysed plant accessions (Fig. S8b,d,f). The absence of GLDH from the M of C<sub>3</sub>-C<sub>4</sub> accessions supports the hypothesis that it operates a C<sub>2</sub> photorespiratory CO<sub>2</sub> pump. The presence of GLDH in the BS of C<sub>3</sub> *A. semialata* may indicate the capacity to use a C<sub>2</sub> pump, as has been proposed in the past (Ueno & Sentoku 2006). However, as measurements of CO<sub>2</sub> compensation point in C<sub>3</sub> *A. semialata* accessions consistently fall within the range of typical C<sub>3</sub> grasses (Ueno & Sentoku 2006; Lundgren *et al.* 2016), any C<sub>2</sub> activity in these plants would be very weak. Immunodetection of the large subunit of Rubisco (RBCL) indicates its presence and similar abundance in both the M and BS cells of C<sub>3</sub>, C<sub>3</sub>-C<sub>4</sub>, and C<sub>4</sub> *A. semialata* (Fig. S9), supporting previous findings in the C<sub>3</sub> and C<sub>4</sub> accessions of this species (Ueno & Sentoku 2006). However, C<sub>4</sub> *A. semialata* have more chloroplasts per BS cell and more numerous BS cells via greater vein density, implying more Rubisco in BS than M cells. Although Rubisco is abundant in the M of C<sub>4</sub> *A. semialata*, these plants have clear C<sub>4</sub> δ<sup>13</sup>C isotope values (-12.10 ‰), which indicates that little to no atmospheric CO<sub>2</sub> is directly fixed by M Rubisco. Together, these immunolocalization findings indicate a complete shift in GLDH localization between C<sub>3</sub> and

C<sub>3</sub>-C<sub>4</sub> phenotypes, no GLDH shift between C<sub>3</sub>-C<sub>4</sub> and C<sub>4</sub> *A. semialata*, and no change in RBCL localization across M and BS chloroplasts in *A. semialata*.

#### **SUPPORTING INFORMATION MATERIALS 1 REFERENCES**

Frean, M.L., Ariovich, D. & Cresswell, C.F. (1983). C<sub>3</sub> and C<sub>4</sub> Photosynthetic and anatomical forms of *Alloteropsis semialata* (R. Br.) Hitchcock: 2. A comparative investigation of leaf ultrastructure and distribution of chlorenchyma in the two forms. *Ann Bot* **51**, 811-821.

Hattersley, P.W., Wong, S.C., Perry, S. & Roksandic, Z. (1986). Comparative ultrastructure and gas-exchange characteristics of the C<sub>3</sub>-C<sub>4</sub> intermediate *Neurachne minor* S. T. Blake (Poaceae). *Plant Cell Environ* **9**, 217-233.

Khoshravesh, R., Lundsgaard-Nielsen, V., Sultmanis, S. & Sage, T.L. (2017). Light Microscopy, Transmission Electron Microscopy, and Immunohistochemistry Protocols for Studying Photorespiration. *Photorespiration*. Humana Press, New York, USA. pp. 243-270.

Lundgren, M.R., Christin P.A., Gonzalez Escobar, E., Ripley, B.S., Besnard, G., Long, C.M., *et al.* (2016). Evolutionary implications of C<sub>3</sub>-C<sub>4</sub> intermediates in the grass *Alloteropsis semialata*. *Plant Cell Environ.*, **39**, 1974-1885.

Muhaidat, R., Sage, T.L., Frohlich, M.W., Dengler, N.G. & Sage, R.F. (2011).

Characterization of C<sub>3</sub>-C<sub>4</sub> intermediate species in the genus *Heliotropium* L. (Boraginaceae): anatomy, ultrastructure and enzyme activity. *Plant Cell Environ.*, **34**, 1723-1736.

Sage, R.F., Khoshravesh, R., Sage, T.L. (2014) From proto-Kranz to C<sub>4</sub> Kranz: building the bridge to C<sub>4</sub> photosynthesis. *J Exp. Bot.* **65**, 3341-3356.

Stata, M., Sage, T.L., Rennie, T.D., Khoshravesh, R., Sultmanis, S., Khaikin, Y., *et al.* (2014). Mesophyll cells of C<sub>4</sub> plants have fewer chloroplasts than those of closely related C<sub>3</sub> plants. *Plant Cell Environ.*, 37, 2587-2600.

Stata, M., Sage, T.L., Hoffmann, N., Covshoff, S., Wong, G.K-S., & Sage, R.F. (2016). Mesophyll chloroplast investment in C<sub>3</sub>, C<sub>4</sub> and C<sub>2</sub> species of the genus *Flaveria*. *Plant Cell Physiol.*, 57, 904-918.

Ueno, O. & Sentoku, N. (2006). Comparison of leaf structure and photosynthetic characteristics of C<sub>3</sub> and C<sub>4</sub> *Alloteropsis semialata* subspecies. *Plant Cell Environ* **29**, 257-268.

## SUPPORTING INFORMATION DATASETS

---

**Dataset S1.** Comprehensive anatomical measurements for all accessions

**Dataset S2.** Larger vein density dataset

**Dataset S3.** Field vs controlled environment plasticity dataset

**Dataset S4.** Growth CO<sub>2</sub> concentration plasticity dataset

## SUPPORTING INFORMATION FIGURES

---

### **Figure S1. Examples of comprehensive leaf anatomy measurement methods.** Panel A

demonstrates a single leaf segment, defined as the leaf area between two secondary ( $2^\circ$ ) veins in cross section. Vein orders are listed below, showing the two flanking  $2^\circ$  veins and the tertiary ( $3^\circ$ ), quaternary ( $4^\circ$ ), and quinary ( $5^\circ$ ) veins within this segment. Leaf segments near the primary vein, or mid-rib, were not included in this study. Throughout the study, secondary and tertiary veins are considered “major” veins and quaternary and quinary veins are considered “minor” veins. Panel B demonstrates the measurements of epidermis and bulliform cells (cyan), outer bundle sheath (yellow), inner bundle sheath (green), vasculature (blue), extraxylary fibres (magenta), and bundle sheath extensions (red). All intervening area not included in these categories was considered mesophyll (uncoloured). Panel C demonstrates the two leaf thickness measurements (red arrows) along the secondary veins that were averaged to determine leaf thickness for each segment and measurements collected to determine the average interveinal distance between all veins (pink arrows) and major (yellow arrows). Panel D shows how the minimum number of mesophyll cells between all veins (red) and between major veins (yellow) were counted, before generating an average value per leaf segment. Panel E demonstrates measurements of individual mesophyll (red), outer bundle sheath (yellow), and inner bundle sheath (green) cells, which were averaged across the leaf segment. The average individual cell areas of inner and outer bundle sheaths were measured separately in secondary ( $n=10$  cells), tertiary ( $n=12$  cells), and minor vein ( $n=15$  cells) orders. The areas of 15 mesophyll cells distributed across the leaf segment were measured and averaged.

**Figure S2. Relationships between anatomical traits.** Panel A plots leaf thickness against the average interveinal distance between major veins, with dots scaled to the total area of mesophyll per segment. Panel B plots the average number of mesophyll cells between all veins against the average area of individual mesophyll cells, with dots scaled to the average



interveinal distance between all veins. Panel C plots vein density against the average area of individual inner bundle sheath (BS) cells on tertiary veins, with dots scaled to the total area of inner BS per segment. For all plots, C<sub>3</sub> accessions are in blue, C<sub>3</sub>-C<sub>4</sub> in green, and C<sub>4</sub> in red.

**Figure S3. Comparison of extraxylary fibre area in C<sub>3</sub>, C<sub>3</sub>-C<sub>4</sub> and C<sub>4</sub> accessions.**

Comparisons of (A) extraxylary fibre area per segment and (B) extraxylary fibre area per vein. Colors indicate photosynthetic type with C<sub>3</sub> (blue; n=17), C<sub>3</sub>-C<sub>4</sub> (green; n=6), and C<sub>4</sub> (red; n=27). Data are mean ± SE.

**Figure S4. Relationships between inner bundle sheath cell size and overall bundle sheath areas.**

Total bundle sheath (BS) area per segment is plotted against the average area of individual BS cells on (A) secondary, (B) tertiary, and (C) minor veins. The total BS area for each vein order is plotted against the average area of individual BS cells on the same vein order for (D) secondary, (E) tertiary, and (F) minor veins. For all plots, C<sub>3</sub> accessions are in blue, C<sub>3</sub>-C<sub>4</sub> in green, and C<sub>4</sub> in red. Linear relationships are plotted in black along the whole dataset for all plots, except plot E where the relationship is plotted separately for C<sub>4</sub> (red) and non-C<sub>4</sub> (black) accessions.

**Figure S5. Comparison of bundle sheath size in African and non-African C<sub>4</sub> accessions.**

Mean area of inner bundle sheath cells (i.e., mestome sheath cells) in C<sub>3</sub>, C<sub>3</sub>-C<sub>4</sub>, C<sub>4</sub> African, and C<sub>4</sub> non-African *Alloteropsis semialata* accessions (n=17, 6, 20, and 7, respectively).

**Figure S6. Plasticity for leaf anatomical components differs by photosynthetic type.**

Vein density (i.e., veins per segment), average area of individual bundle sheath (BS) cells on tertiary veins, average number of mesophyll (M) cells between all vein orders, and leaf thickness are plotted for C<sub>3</sub> (blue), C<sub>3</sub>-C<sub>4</sub> (green), and C<sub>4</sub> (red) accessions of *Alloteropsis semialata* grown in (A-D) their native field vs. controlled environment and (E-H) low vs. ambient CO<sub>2</sub> concentrations. Data are means ± 1 SE. T-tests were performed separately by

photosynthetic type to determine whether leaf anatomy differed in the two environments. Where significant, *t* and *p* statistics are provided in the relevant color. Non-significant relationships are denoted with NS.

**Figure S7. Organelle abundance differs between photosynthetic types.** Mesophyll (A, C, E) and bundle sheath (B, D, F) cell anatomy of C<sub>3</sub> (A-B), C<sub>3</sub>-C<sub>4</sub> (C-D), and C<sub>4</sub> (E-F) *A. semialata*. Black and white asterisks label mitochondria and peroxisomes, respectively; +, chloroplast. Scale bars are 2 μm.

**Figure S8. Immunodetection of GLDH.** Presence of glycine decarboxylase H sub-protein (GLDH) in the mesophyll (A, C, E) and bundle sheath (B, D, F) of C<sub>3</sub> (A-B), C<sub>3</sub>-C<sub>4</sub> (C-D), and C<sub>4</sub> (E-F) *Alloteropsis semialata*. Black and white asterisks label mitochondria and peroxisomes, respectively; +, chloroplast. Scale bars are 100 nm. The detection of GLDH follows Khoshravesh *et al.* 2017, except that the blocking time was 30 min in 0.5% BSA in PBS and primary and secondary antibody dilutions were 1:100 (3 h) and 1:20 (1 h), respectively. The Anti-GLDH antiserum was obtained by Agrisera (Vännäs, Sweden) against the recombinant protein from *Flaveria bidentis*.

**Figure S9. Immunodetection of Rubisco large subunit.** Presence of the Rubisco large subunit in the mesophyll (A, C, E) and bundle sheath cells (B, D, F) of C<sub>3</sub> (A, B), C<sub>3</sub>-C<sub>4</sub> (C, D), and C<sub>4</sub> (E, F) *Alloteropsis semialata*. C, chloroplast. Bar, 500 nm. The detection of RBCL follows Khoshravesh *et al.* 2017. The anti-RBCL antiserum was obtained from Agrisera Antibodies (Vännäs, Sweden).

## SUPPORTING INFORMATION TABLES

**Table S1.** Geography, stable carbon isotope ( $\delta^{13}\text{C}$ ),  $\text{CO}_2$  compensation point (CCP), and phylogenetic clade details used to determine photosynthetic pathway for each *Alloteropsis semialata* accession.  $\delta^{13}\text{C}$  distinguish  $\text{C}_4$  ( $> -16$ ) from non- $\text{C}_4$  ( $< -17$ ).  $\text{C}_3$ - $\text{C}_4$  are distinguished from  $\text{C}_3$  via country, CCP, and clade.

| Accession | Country      | $\delta^{13}\text{C}^a$ | CCP               | Clade                                        | Pathway                     |
|-----------|--------------|-------------------------|-------------------|----------------------------------------------|-----------------------------|
| GMT-1     | South Africa | -29.10                  | 42.6              | Southern Africa $\text{C}_3^e$               | $\text{C}_3$                |
| KWT-3     | South Africa | -26.30                  | 44.7 <sup>b</sup> | Southern Africa $\text{C}_3^e$               | $\text{C}_3$                |
| ZIM 02-5  | Zimbabwe     | -26.61                  | NA                | Southern Africa $\text{C}_3^e$               | $\text{C}_3$                |
| ZIM 03-01 | Zimbabwe     | -25.69                  | 42.2              | Southern Africa $\text{C}_3^e$               | $\text{C}_3$                |
| CRL-4-2   | South Africa | -24.80                  | 54.8 <sup>b</sup> | Southern Africa $\text{C}_3^c$               | $\text{C}_3$                |
| KSD       | South Africa | -28.00                  | NA                | Southern Africa $\text{C}_3^c$               | $\text{C}_3$                |
| LSU-3     | South Africa | -25.70                  | NA                | Southern Africa $\text{C}_3^c$               | $\text{C}_3$                |
| MDB       | South Africa | -23.16                  | NA                | Southern Africa $\text{C}_3^c$               | $\text{C}_3$                |
| MTP 2     | South Africa | -26.00                  | NA                | Southern Africa $\text{C}_3^c$               | $\text{C}_3$                |
| SNR       | South Africa | -27.76                  | NA                | Southern Africa $\text{C}_3^c$               | $\text{C}_3$                |
| JMS-1     | South Africa | -26.80                  | 52.8 <sup>b</sup> | Southern Africa $\text{C}_3^d$               | $\text{C}_3$                |
| ASM       | South Africa | -26.35                  | NA                | NA                                           | $\text{C}_3$                |
| BST       | South Africa | -25.74                  | NA                | NA                                           | $\text{C}_3$                |
| EML-11-3  | South Africa | -26.25                  | 49.5 <sup>b</sup> | NA                                           | $\text{C}_3$                |
| MR        | South Africa | -27.99                  | NA                | NA                                           | $\text{C}_3$                |
| SFB       | South Africa | -26.55                  | NA                | NA                                           | $\text{C}_3$                |
| ZIM 04-01 | Zimbabwe     | -26.10                  | NA                | NA                                           | $\text{C}_3$                |
| L01-A     | Tanzania     | -26.30                  | 19.4 <sup>b</sup> | Central Africa $\text{C}_3$ - $\text{C}_4^e$ | $\text{C}_3$ - $\text{C}_4$ |
| L04-D     | Tanzania     | -23.10                  | 25.6 <sup>b</sup> | Central Africa $\text{C}_3$ - $\text{C}_4^e$ | $\text{C}_3$ - $\text{C}_4$ |
| TAN 02-01 | Tanzania     | -24.62                  | 10.5              | Central Africa $\text{C}_3$ - $\text{C}_4^e$ | $\text{C}_3$ - $\text{C}_4$ |
| TAN 04-16 | Tanzania     | -25.07                  | NA                | Central Africa $\text{C}_3$ - $\text{C}_4^e$ | $\text{C}_3$ - $\text{C}_4$ |
| ZAM 03-03 | Zambia       | -31.06                  | NA                | Central Africa $\text{C}_3$ - $\text{C}_4^e$ | $\text{C}_3$ - $\text{C}_4$ |
| ZAM 07-02 | Zambia       | -22.25                  | 9.1               | Central Africa $\text{C}_3$ - $\text{C}_4^e$ | $\text{C}_3$ - $\text{C}_4$ |
| PHL       | Philippines  | -15.85                  | 1.7               | Asian/Australian $\text{C}_4^e$              | $\text{C}_4$                |
| QLSD      | Australia    | -12.10                  | 5.1 <sup>b</sup>  | Asian/Australian $\text{C}_4^e$              | $\text{C}_4$                |
| TWN 10    | Taiwan       | -14.60                  | 4.6               | Asian/Australian $\text{C}_4^e$              | $\text{C}_4$                |
| BF        | Burkina Faso | -11.20                  | 5.2 <sup>b</sup>  | African $\text{C}_4^e$                       | $\text{C}_4$                |
| MAJ       | Madagascar   | -11.80                  | 12.3 <sup>b</sup> | African $\text{C}_4^e$                       | $\text{C}_4$                |
| MDG-1     | South Africa | -13.70                  | 5.6 <sup>b</sup>  | African $\text{C}_4^e$                       | $\text{C}_4$                |
| SFD-1-3   | South Africa | -12.40                  | 5.2 <sup>b</sup>  | African $\text{C}_4^e$                       | $\text{C}_4$                |
| CAM 1-3   | Cameroon     | -12.30                  | 2.4               | NA                                           | $\text{C}_4$                |
| L02-M     | Tanzania     | -11.40                  | NA                | African basal $\text{C}_4^e$                 | $\text{C}_4$                |
| TAN 03-01 | Tanzania     | -12.03                  | 2.9               | African basal $\text{C}_4^e$                 | $\text{C}_4$                |
| AUS 09-01 | Australia    | -14.38                  | NA                | NA                                           | $\text{C}_4$                |
| AUS 10-01 | Australia    | -13.94                  | NA                | NA                                           | $\text{C}_4$                |
| AUS 18-01 | Australia    | -14.41                  | NA                | NA                                           | $\text{C}_4$                |
| AUS 25-01 | Australia    | -12.82                  | NA                | NA                                           | $\text{C}_4$                |
| GB61      | Madagascar   | -13.67                  | NA                | NA                                           | $\text{C}_4$                |
| MOZ 01    | Mozambique   | -13.16                  | NA                | NA                                           | $\text{C}_4$                |
| MSV 1935A | Madagascar   | -12.62                  | NA                | NA                                           | $\text{C}_4$                |
| MSV 1937  | Madagascar   | -12.91                  | NA                | NA                                           | $\text{C}_4$                |
| MSV 2081  | Madagascar   | -13.02                  | NA                | NA                                           | $\text{C}_4$                |

| Accession | Country | $\delta^{13}\text{C}^a$ | CCP | Clade | Pathway        |
|-----------|---------|-------------------------|-----|-------|----------------|
| ZAM 01-01 | Zambia  | -12.00                  | 5.4 | NA    | C <sub>4</sub> |
| ZAM 04-01 | Zambia  | -12.22                  | 2.9 | NA    | C <sub>4</sub> |
| ZAM 05-01 | Zambia  | -13.01                  | 3.4 | NA    | C <sub>4</sub> |
| ZAM 06-01 | Zambia  | -12.10                  | 1.5 | NA    | C <sub>4</sub> |
| ZAM 07-16 | Zambia  | -13.19                  | 3.5 | NA    | C <sub>4</sub> |
| ZAM 08-01 | Zambia  | -12.52                  | 1.7 | NA    | C <sub>4</sub> |
| ZAM 09-02 | Zambia  | -13.70                  | 3.0 | NA    | C <sub>4</sub> |
| ZAM 10-01 | Zambia  | -12.59                  | 2.4 | NA    | C <sub>4</sub> |

<sup>a</sup>The carbon isotope composition of plant tissues ( $\delta^{13}\text{C}$ ) was measured on dried leaf tissue using an ANCA GSL preparation module coupled to a 20–20 stable isotope analyser (PDZ Europa, Cheshire, UK). Plants with  $\delta^{13}\text{C}$  values higher than  $-17\text{‰}$  were considered to have a fully functioning C<sub>4</sub> system, while those with values lower than this threshold were considered either C<sub>3</sub> or C<sub>3</sub>-C<sub>4</sub>. <sup>b</sup>Lundgren *et al.* 2016. Evolutionary implications of C<sub>3</sub>-C<sub>4</sub> intermediates in the grass *Alloteropsis semialata*. *Plant, Cell & Environment* 39: 1974-1885. <sup>c</sup>Lundgren *et al.* 2015. Photosynthetic innovation broadens the niche within a single species. *Ecology Letters* 18: 1021-1029. <sup>d</sup>Olofsson *et al.* 2016. Genome biogeography reveals the intraspecific spread of adaptive mutations for a complex trait. *Molecular Ecology* 25: 6107–6123. <sup>e</sup>unpublished.

**Table S2.** Details of the *Alloteropsis semialata* accessions used in the plasticity experiment and the environmental conditions at their field collection site.

MAT, mean annual temperature; MAP, mean annual precipitation; T, temperature.

| Accession | Pathway                        | Country      | Light         | MAT (°C) | Max T (°C) | Min T (°C) | Growing Season T (°C) | MAP (mm) |
|-----------|--------------------------------|--------------|---------------|----------|------------|------------|-----------------------|----------|
| CRL-4-2   | C <sub>3</sub>                 | South Africa | Full sun      | 14.8     | 26.7       | 1.3        | 17.9                  | 828      |
| EML-11-3  | C <sub>3</sub>                 | South Africa | Full sun      | 14.1     | 26.2       | 0.2        | 17.3                  | 743      |
| KWT-3     | C <sub>3</sub>                 | South Africa | Full sun      | 17.0     | 27.1       | 7.2        | 17.7                  | 753      |
| ZIM-2-5   | C <sub>3</sub>                 | Zimbabwe     | Full sun      | 14.4     | 22.9       | 4.1        | 17.1                  | 1265     |
| ZIM-3-1   | C <sub>3</sub>                 | Zimbabwe     | Full sun      | 15.5     | 23.9       | 4.9        | 18.3                  | 1088     |
| LO1-A     | C <sub>3</sub> -C <sub>4</sub> | Tanzania     | Partial shade | 23.6     | 31.7       | 15.2       | 23.4                  | 934      |
| LO4-A     | C <sub>3</sub> -C <sub>4</sub> | Tanzania     | Partial shade | 16.6     | 24.9       | 7.2        | 17.7                  | 1415     |
| TAN-2-1   | C <sub>3</sub> -C <sub>4</sub> | Tanzania     | Partial shade | 16.7     | 25.0       | 7.1        | 17.1                  | 957      |
| ZAM-7-2   | C <sub>3</sub> -C <sub>4</sub> | Zambia       | Partial shade | 18.9     | 29.0       | 6.2        | 19.6                  | 1365     |
| CAM-1-3   | C <sub>4</sub>                 | Cameroon     | Full sun      | 22.7     | 29.0       | 15.2       | 21.6                  | 1934     |
| MDG-1     | C <sub>4</sub>                 | South Africa | Full sun      | 17.3     | 29.8       | 2.8        | 20.6                  | 675      |
| SFD-4     | C <sub>4</sub>                 | South Africa | Full sun      | 14.2     | 26.0       | 1.3        | 18.6                  | 759      |
| TAN-3-1   | C <sub>4</sub>                 | Tanzania     | Partial shade | 20.2     | 28.5       | 11.0       | 20.6                  | 972      |

| <b>Accession</b> | <b>Pathway</b> | <b>Country</b> | <b>Light</b>                        | <b>MAT (°C)</b> | <b>Max T (°C)</b> | <b>Min T (°C)</b> | <b>Growing Season T (°C)</b> | <b>MAP (mm)</b> |
|------------------|----------------|----------------|-------------------------------------|-----------------|-------------------|-------------------|------------------------------|-----------------|
| ZAM-1-1          | C <sub>4</sub> | Zambia         | Partial shade                       | 20.1            | 29.0              | 10.2              | 20.3                         | 1205            |
| ZAM-10-1         | C <sub>4</sub> | Zambia         | Partial shade                       | 19.9            | 30.4              | 6.0               | 21.2                         | 1103            |
| ZAM-5-1          | C <sub>4</sub> | Zambia         | Full sun                            | 19.9            | 29.6              | 7.4               | 20.5                         | 1224            |
| ZAM-9-2          | C <sub>4</sub> | Zambia         | Partial shade                       | 19.1            | 30.4              | 4.6               | 20.2                         | 1211            |
|                  |                |                |                                     |                 |                   |                   |                              |                 |
|                  |                |                | Mean C <sub>3</sub>                 | 15.2            | 25.4              | 3.5               | 17.7                         | 935             |
|                  |                |                | Mean C <sub>3</sub> -C <sub>4</sub> | 18.9            | 27.7              | 8.9               | 19.4                         | 1168            |
|                  |                |                | Mean C <sub>4</sub>                 | 19.2            | 29.1              | 7.3               | 20.5                         | 1135            |
|                  |                |                |                                     |                 |                   |                   |                              |                 |
|                  |                |                | Minimum                             | 14.1            | 22.9              | 0.2               | 17.1                         | 675             |
|                  |                |                | Maximum                             | 23.6            | 31.7              | 15.2              | 23.4                         | 1934            |
|                  |                |                |                                     |                 |                   |                   |                              |                 |
